# Supplementary material
Source: PubMed Central journal article supplement (PMC3302241)

## M Segment

***Huaiyangshan virus***

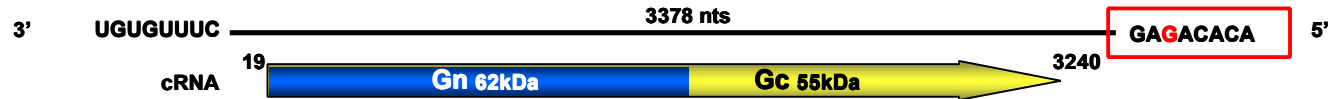

***Uukuniemi UUKV***

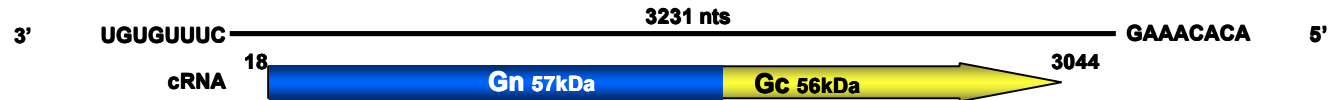

***Phlebovirus RVFV***

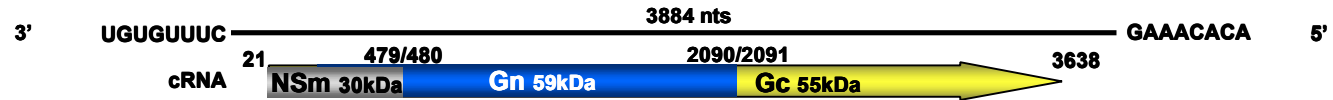

***Tospovirus TSWV***

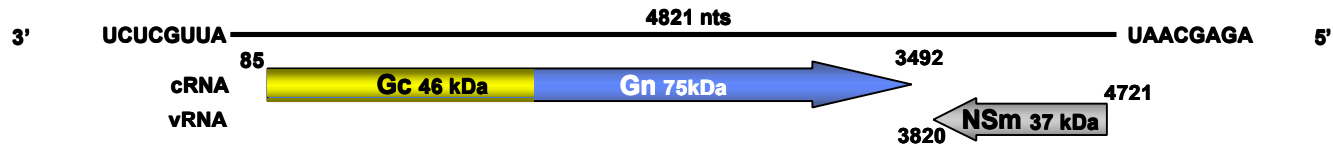

***Orthobunyavirus BUNV***

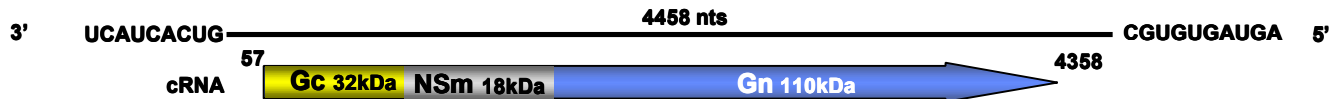

***Hantavirus HTNV***

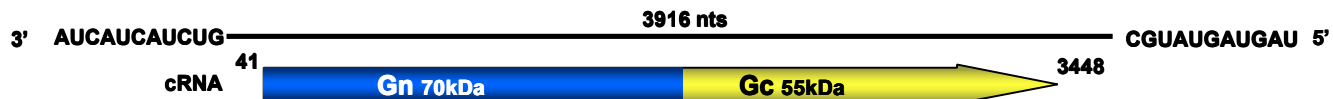

***Nairovirus DUGV***

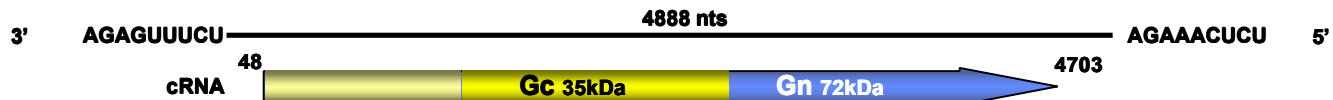

Supplement: supp_86.5.2864_FigS2B.pdf [file supp_86.5.2864_FigS2B.pdf]
